# Supplementary material
Source: HighWire-hosted journal article supplement (https://erj.ersjournals.com/content/57/4/2004315)
Supplement: inline-supplementary-material-1 [file inline-supplementary-material-1.pdf]

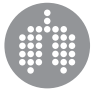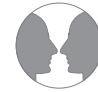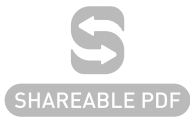

# Defining optimal fluoroquinolone exposure against *Mycobacterium tuberculosis*: contribution of murine studies

Thomas Maitre <sup>1</sup>, Lorenzo Guglielmetti <sup>1,2</sup> and Nicolas Veziris<sup>1,2,3</sup>

**Affiliations:** <sup>1</sup>Sorbonne Université, INSERM, U1135, Centre d'Immunologie et des Maladies Infectieuses, Cimi-Paris, équipe 13, Paris, France. <sup>2</sup>APHP, Groupe Hospitalier Universitaire Sorbonne Université, Hôpital Pitié-Salpêtrière, Centre National de Référence des Mycobactéries et de la Résistance des Mycobactéries aux Antituberculeux, Paris, France. <sup>3</sup>APHP, Groupe Hospitalier Universitaire Sorbonne Université, Hôpital Saint-Antoine, Département de Bactériologie, Paris, France.

**Correspondence:** Thomas Maitre, Sorbonne Université, Faculté de Médecine, Site Pitié Salpêtrière, 91 bd de l'Hôpital, Paris 75005, France. E-mail: thomas.maitre5@gmail.com

@ERSpublications

**The proportion of TB patients attaining the fluoroquinolone target exposure, as defined by *in vitro* models, is very low in clinical practice; however, it would be even smaller if the target AUC/MIC ratios were calculated in murine models of tuberculosis** <https://bit.ly/2Wg8K8H>

**Cite this article as:** Maitre T, Guglielmetti L, Veziris N. Defining optimal fluoroquinolone exposure against *Mycobacterium tuberculosis*: contribution of murine studies. *Eur Respir J* 2021; 57: 2004315 [<https://doi.org/10.1183/13993003.04315-2020>].

This single-page version can be shared freely online.

We read with interest the research letter published by DAVIES FORSMAN *et al.* [1] in the *European Respiratory Journal*. The authors determined the proportion of multidrug-resistant tuberculosis patients treated with moxifloxacin or levofloxacin who attained an optimal exposure for these drugs. The target exposure corresponded to the area under the curve (AUC<sub>0-24h</sub>)/minimal inhibitory concentration (MIC) ratio generating the optimal bactericidal activity. The authors based their calculations on the AUC<sub>0-24h</sub>/MIC ratio measured in a preclinical model called Hollow Fiber System (HFS), an *in vitro* model used to assess anti-tuberculosis activity of candidate drugs. Based on this model, they reported that the target ratio was reached in only half of patients receiving moxifloxacin, and in none of those receiving levofloxacin.
